# Supplementary material for: Removal of Copper Corrosion Products by Using Green Deep Eutectic Solvent and Bio-Derivative Cellulose Membrane
Source: MDPI journal article supplement (doi:10.3390/polym14112284), 2022-06-04
Supplement: s1 [file s1]

# Removal of Copper Corrosion Products by Using Green Deep Eutectic Solvent and Bio-Derivative Cellulose Membrane

Akiko Tsurumaki<sup>1,2,\*</sup>, Cristina Chiarucci<sup>1</sup>, Shraddha Khaire<sup>1</sup>, Chiara Dal Bosco<sup>1</sup>, Alessandra Gentili<sup>1,2</sup>, and Maria Assunta Navarra<sup>1,2,\*</sup>

<sup>1</sup> Department of Chemistry, Sapienza University of Rome, Piazzale Aldo Moro 5, Rome 00185, Italy;

<sup>2</sup> Centro di Ricerca Hydro-Eco, Department of Basic and Applied Sciences for Engineering (SBAI), Sapienza University of Rome, Via Antonio Scarpa 16, 00161 Roma, Italy.

\* Correspondence: akiko.tsurumaki@uniroma1.it (A.T.); mariassunta.navarra@uniroma1.it (M.A.N.); Tel.: +39-06-4991-3664 (A.T.); +39-06-4991-3658 (M.A.N.)

|                   | DES10                                                                               | DES30                                                                               | DES50                                                                               | DES70                                                                                | DES80                                                                                 | DES90                                                                                 |
|-------------------|-------------------------------------------------------------------------------------|-------------------------------------------------------------------------------------|-------------------------------------------------------------------------------------|--------------------------------------------------------------------------------------|---------------------------------------------------------------------------------------|---------------------------------------------------------------------------------------|
| Soon after mixing | 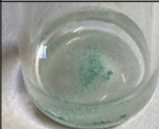  |   |   |   |   |   |
| After 1h          |  |  |  |  |  |  |
| After 1day        |  |  | No change                                                                           | No change                                                                            |  |  |
| After 4 days      | No change                                                                           | No change                                                                           |  | No change                                                                            | No change                                                                             |  |
| After 1 week      |  |  |  |  |  |  |

**Figure S1.** Photos taken during the course of dissolution test of patina powders. DES10: Formation of blue precipitation after partial dissolution of patina. DES30: Formation of blue precipitation after complete dissolution. DES50: Formation of greenish blue precipitation after complete dissolution, which was then turned into brown. DES70: Color change after complete dissolution but no formation of precipitation. DES80 & 90: Slow but complete dissolution. No change in the solution color after 1 week.

|                   | DES10                                                                               | DES30                                                                               | DES50                                                                               | DES70                                                                                | DES80                                                                                 | DES90                                                                                 |
|-------------------|-------------------------------------------------------------------------------------|-------------------------------------------------------------------------------------|-------------------------------------------------------------------------------------|--------------------------------------------------------------------------------------|---------------------------------------------------------------------------------------|---------------------------------------------------------------------------------------|
| Soon after mixing | 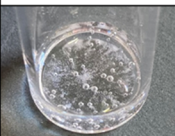   |    |    |    |    |    |
| After 1h          |    |    |    |    |    |    |
| After 1day        | No change                                                                           | No change                                                                           | No change                                                                           | No change                                                                            |   |   |
| After 1 week      |  |  |  |  |  |  |

**Figure S2.** Photos taken during the course of dissolution test of calcium carbonate. DES10: Trace amount of  $\text{CaCO}_3$  remained in the bottom of vial. DES30, 50 & 70: Fast and complete dissolution. DES80 & 90: Incomplete dissolution even after 1 week.

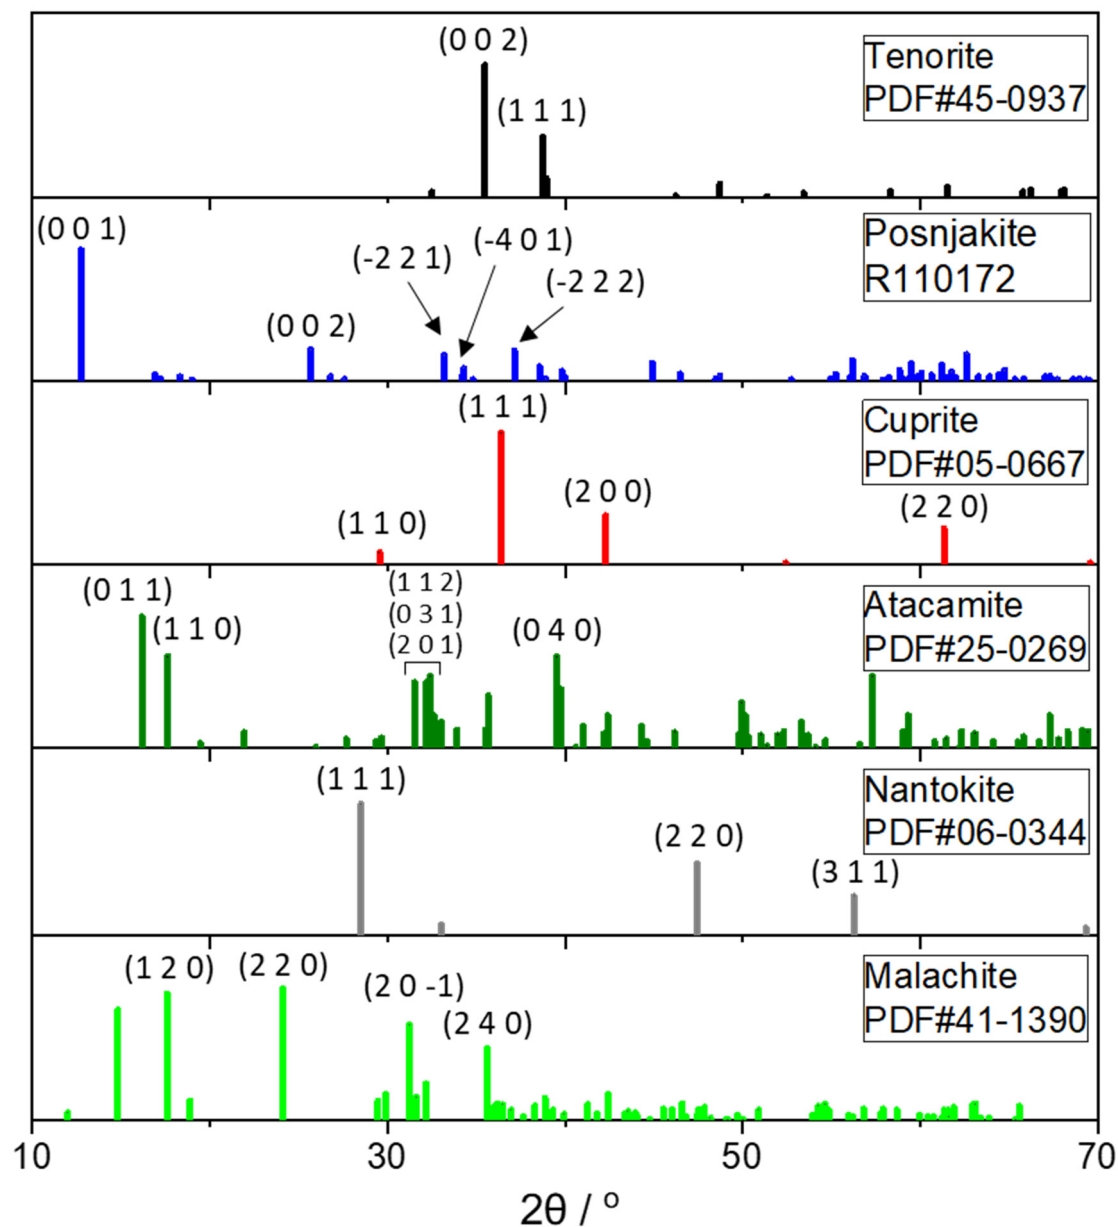

**Figure S3.** Reference spectra used for the assignment of Figure 4 (tenorite PDF#45-0937, cuprite PDF#05-0667, atacamite PDF#25-0269, nantokite PDF#06-0344, and malachite PDF#41-1390 taken from the International Centre for Diffraction Data (ICDD), as well as posnjakite R110172 taken from the RRUFF database).
